# Supplementary material for: Nonlinear optical activity in dipolar organic–lanthanide complexes
Source: Royal Society of Chemistry journal article supplement (doi:10.1039/b926376d), 2010-01-01
Supplement: b926376d.pdf [file b926376d.pdf]

# Nonlinear Optical Activity in Dipolar Organic- Lanthanide Complexes

Ga-Lai Law,<sup>d</sup> Ka-Leung Wong,<sup>c</sup> Kok-Kin Lau<sup>d</sup>, Lap Sze-to<sup>d</sup>, Peter A. Tanner,<sup>\*b</sup> Fonchu Kuo,<sup>e</sup> and Wing-Tak Wong<sup>\*a</sup>

<sup>a</sup> Department of Applied Biology and Chemistry, The Hong Kong Polytechnic University, Hung Hom, Hong Kong SAR.. Tel: 852 3400 8789; E-mail: [bcwfwong@polyu.edu.hk](mailto:bcwfwong@polyu.edu.hk)

<sup>b</sup> Department of Biology and Chemistry, City University of Hong Kong, Kowloon Tong, Hong Kong SAR. Tel: 852 2788 7840; E-mail: [bhtan@cityu.edu.hk](mailto:bhtan@cityu.edu.hk)

<sup>c</sup> Department of Chemistry, Hong Kong Baptist University, Kowloon Tong, Hong Kong SAR..

<sup>d</sup> Department of Chemistry, University of California, Berkeley, Berkeley, US CA 94720-1460.

<sup>e</sup> Department of Computer Science, Soochow University, Taipei, Taiwan.

## Supporting Information for publication

### Synthesis of Complexes and Characterization by FT-IR and ESI-MS.

**Figure S1** Selected SHG of lanthanide complexes (Ln = Dy, Er, Gd and Tb,  $\lambda_{\text{ex}} = 1.15 \mu\text{m}$ ).

**Figure S2.** Powder XRD of the series of lanthanide complexes (Type **I**, Ln = Y, Ce, Pr, Nd, Eu and Gd;

Type **II**, Ln = Lu, Yb, Tm and Er) in the solid state. (Full powder pattern of Figure 9).

**Figure S3.** UV-vis absorption spectrum of cinnamic acid and its lanthanide complexes ( $1.0 \times 10^{-5}$  M, MeOH).

**Figure S4.** ESI-MS spectra of Eu, Gd, Tb complexes.

**Table S1.** Crystallographic data collection, intensity measurements and structure refinement and geometric parameters for Ln[C<sub>9</sub>H<sub>7</sub>O<sub>2</sub>]<sub>3</sub>.

**Table S2.** Selected bond lengths (Å) of Ln = Eu **6** (Type **I**) and Ln = Er **12** (Type **II**) complexes.

**Table S3.** Selected bond angles (°) of Ln = Eu **6** (Type **I**) and Ln = Er **12** (Type **II**) complexes.

**Synthesis of lanthanide complexes.** [(*trans*-cinnamate)<sub>3</sub>Ln]<sub>n</sub> (Ln = La, Ce, Pr, Nd, Sm, Eu, Gd, Tb, Dy, Er, Ho, Yb, Tm, Lu and Y): *Trans*-cinnamic acid (300 mg) was used as the chelating ligand with various lanthanide nitrate salts (Aldrich, 99.99%) in the mole ratio 3.5 to 1. The mixtures were stirred for 12 hours in methanol at room temperature and the pale colored precipitates were filtered out and were re-crystallized with acetonitrile. The purified products were isolated as pale-colored crystals.

Ln = La, **1**: white powder; yield: 519 mg (44%). MS (ESI): m/z 581 (M<sup>+</sup> + 2), 580 (M<sup>+</sup> + 1), 579 (M<sup>+</sup>). Ln = Ce, **2**: pale yellow powder; yield: 632 mg (51%). MS (ESI): m/z 582 (M<sup>+</sup> + 2), 581 (M<sup>+</sup> + 1), 580 (M<sup>+</sup>). Ln = Pr, **3**: pale green powder; yield: 706 mg (58%). MS (ESI): m/z 583 (M<sup>+</sup> + 2), 582 (M<sup>+</sup> + 1), 581 (M<sup>+</sup>). Ln = Nd, **4**: pale purple powder; yield: 711 mg (60%). MS (ESI): m/z 588 (M<sup>+</sup> + 3), 587 (M<sup>+</sup> + 2), 586 (M<sup>+</sup> + 1), 585 (M<sup>+</sup>), 584 (M<sup>+</sup> - 1), 583 (M<sup>+</sup> - 2), 582 (M<sup>+</sup> - 3). Ln = Sm, **5**: white powder; yield: 603 mg (48%). MS (ESI): m/z 596 (M<sup>+</sup> + 5), 595 (M<sup>+</sup> + 4), 594 (M<sup>+</sup> + 3), 593 (M<sup>+</sup> + 2), 592 (M<sup>+</sup> + 1), 591 (M<sup>+</sup>), 590 (M<sup>+</sup> - 1), 589 (M<sup>+</sup> - 2), 588 (M<sup>+</sup> - 3), 587 (M<sup>+</sup> - 4). Ln = Eu, **6**: pale yellow powder; yield: 680 mg (57%). MS (ESI): m/z 594 (M<sup>+</sup> + 1), 593 (M<sup>+</sup>), 592 (M<sup>+</sup> - 1), 591 (M<sup>+</sup> - 2). IR (KBr): 1533, 1504 cm<sup>-1</sup> asym v(COO<sup>-</sup>), 1448, 1402 cm<sup>-1</sup> sym v(COO<sup>-</sup>). Ln = Gd, **7**: white powder; yield: 358 mg (30%). MS (ESI): m/z 602 (M<sup>+</sup> + 3), 601 (M<sup>+</sup> + 2), 600 (M<sup>+</sup> + 1), 599 (M<sup>+</sup>), 598 (M<sup>+</sup> - 1), 597 (M<sup>+</sup> - 2), 596 (M<sup>+</sup> - 3). IR (KBr): 1533, 1504 cm<sup>-1</sup> asym v(COO<sup>-</sup>), 1449, 1402 cm<sup>-1</sup> sym v(COO<sup>-</sup>). Ln = Tb, **8**: white powder; yield: 530 mg (44%). MS (ESI): m/z 600 (M<sup>+</sup>), 599 (M<sup>+</sup> - 1), 598 (M<sup>+</sup> - 2). IR (KBr): 1533, 1504 cm<sup>-1</sup> asym v(COO<sup>-</sup>), 1448, 1404 cm<sup>-1</sup> sym v(COO<sup>-</sup>). Ln = Dy, **9**: white powder; yield: 579 mg (47%). MS (ESI): m/z 605 (M<sup>+</sup> + 2), 604 (M<sup>+</sup> + 1), 603 (M<sup>+</sup>), 602 (M<sup>+</sup> - 1), 601 (M<sup>+</sup> - 2), 600 (M<sup>+</sup> - 3). Ln = Y, **10**: white powder; yield: 501 mg (46%). MS (ESI): m/z 532 (M<sup>+</sup> + 2), 531 (M<sup>+</sup> + 1), 530 (M<sup>+</sup>). Ln = Ho, **11**: pale pink powder; yield: 599 mg (48%). MS (ESI): m/z 606 (M<sup>+</sup>), 605 (M<sup>+</sup> - 1), 604 (M<sup>+</sup> - 2). Ln = Er, **12**: pale pink powder; yield: 582 mg (47%). MS (ESI): m/z 609 (M<sup>+</sup> + 1), 608 (M<sup>+</sup>), 607 (M<sup>+</sup> - 1), 606 (M<sup>+</sup> - 2), 605 (M<sup>+</sup> - 3). Ln = Tm, **13**: white powder; yield: 609 mg (49%). MS (ESI): m/z 611 (M<sup>+</sup> + 2), 610 (M<sup>+</sup> + 1), 609 (M<sup>+</sup>). Ln = Yb, **14**: white powder; yield: 689 mg (55%). MS (ESI): m/z 617 (M<sup>+</sup> + 3), 616 (M<sup>+</sup> + 2), 615 (M<sup>+</sup> + 1), 614 (M<sup>+</sup>), 613 (M<sup>+</sup> - 1), 612 (M<sup>+</sup> - 2), 611 (M<sup>+</sup> - 3), 610 (M<sup>+</sup> - 4); IR (KBr): 1533, 1504 cm<sup>-1</sup> asym v(COO<sup>-</sup>), 1448, 1402 cm<sup>-1</sup> sym v(COO<sup>-</sup>). Ln = Lu, **15**: white powder; yield: 689 mg (55%). MS (ESI): m/z 616 (M<sup>+</sup> + 2), 615 (M<sup>+</sup> + 1) IR (KBr): 1534, 1504 cm<sup>-1</sup> asym v(COO<sup>-</sup>), 1448, 1402 cm<sup>-1</sup> sym v(COO<sup>-</sup>). The crystal data of the 14 lanthanide complexes are listed in Table S1.

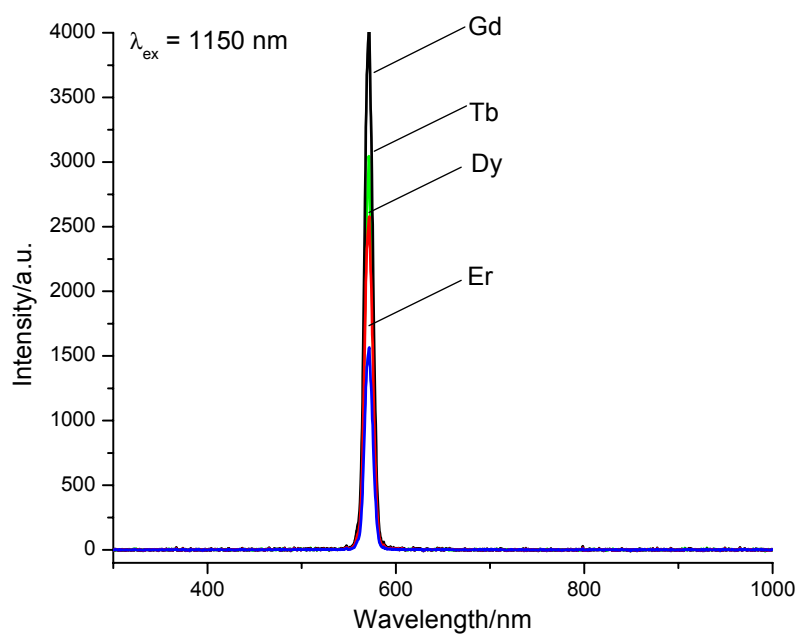

**Figure S1** Selected SHG of lanthanide complexes (Ln = Dy, Er, Gd and Tb,  $\lambda_{ex} = 1.15 \mu\text{m}$ ).

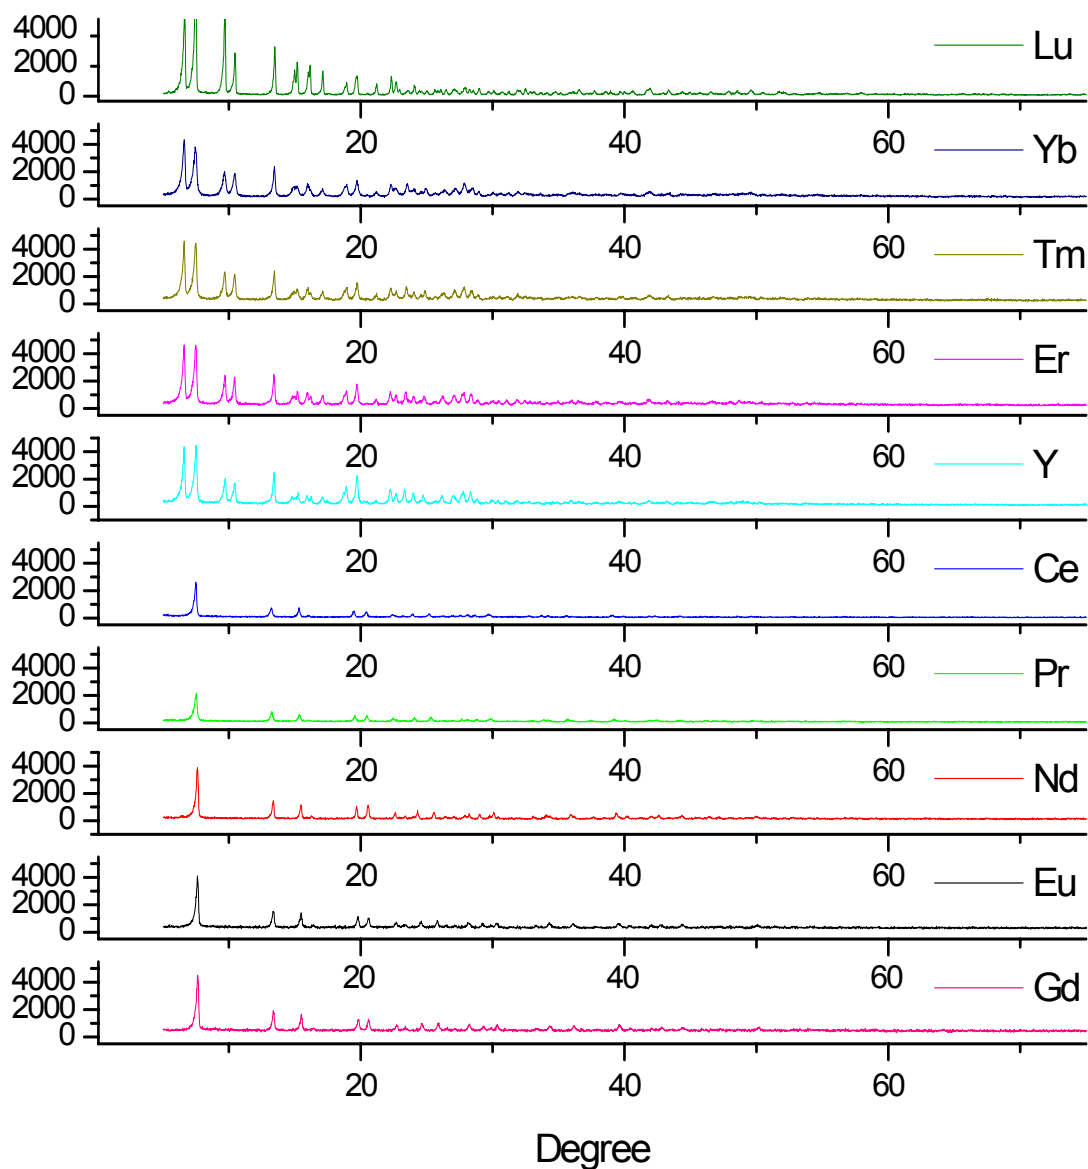

**Figure S2.** Powder XRD of the series of lanthanide complexes (Type I, Ln = Y, Ce, Pr, Nd, Eu and Gd; Type II, Ln = Lu, Yb, Tm and Er) in the solid state. (Full powder pattern of Figure 10).

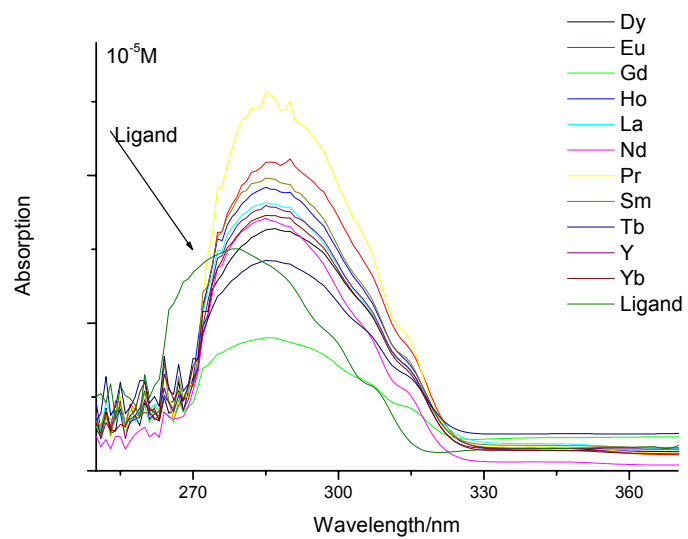

**Figure S3.** UV-vis absorption spectrum of cinnamic acid and its lanthanide complexes ( $1.0 \times 10^{-5} \text{ M}$ , MeOH).

Eu

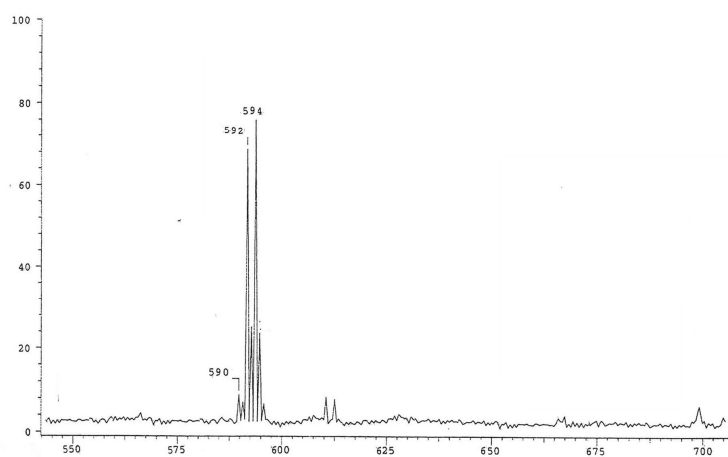

Gd

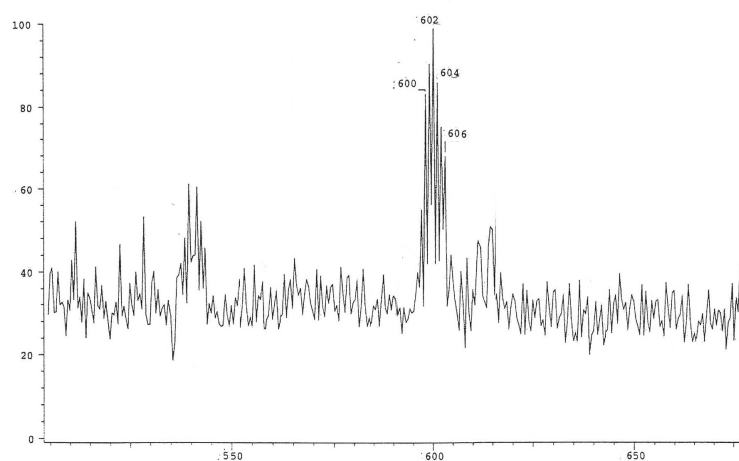

Tb

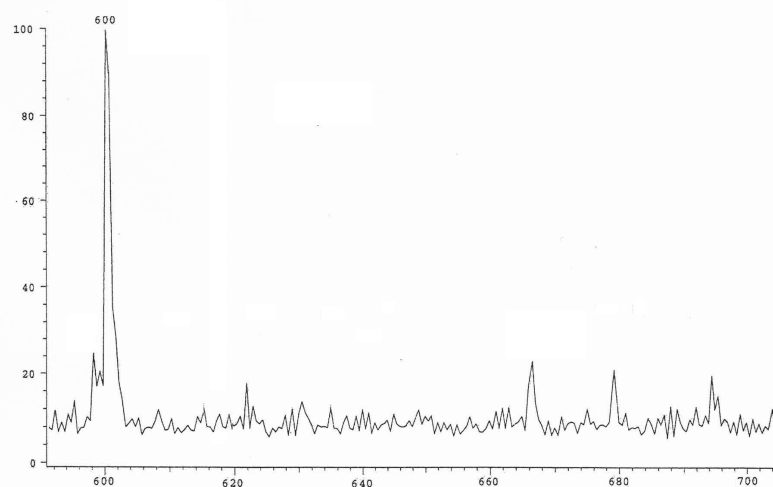

**Table S1.** Crystallographic data collection, intensity measurements and structure refinement and geometric parameters for  $\text{Ln}[\text{C}_9\text{H}_7\text{O}_2]_3\cdot\text{n}$ .

|                                                                     | La                 | Ce                 | Nd                 | Sm                 | Eu                 | Gd                 | Tb                 | Y                    | Dy                   | Ho                   | Er                   | Tm                   | Yb                   | Lu                   |
|---------------------------------------------------------------------|--------------------|--------------------|--------------------|--------------------|--------------------|--------------------|--------------------|----------------------|----------------------|----------------------|----------------------|----------------------|----------------------|----------------------|
| F. W.                                                               | 580.36             | 581.58             | 585.7              | 591.86             | 593.42             | 598.71             | 600.38             | 530.37               | 603.96               | 606.39               | 608.72               | 610.39               | 614.50               | 616.43               |
| T/°C                                                                | 301                | 301                | 301                | 301                | 303                | 301                | 303                | 301                  | 301                  | 301                  | 301                  | 301                  | 301                  | 301                  |
| <b>Crystal system</b>                                               | Trigonal           | Monoclinic           |
| <b>Space Group</b>                                                  | R3c (#161)         | P2 <sub>1</sub> (#4) |
| <i>a</i> / Å                                                        | 22.636(2)          | 22.646(2)          | 22.657(3)          | 22.646(2)          | 22.649(4)          | 22.654(6)          | 22.647(4)          | 11.543(10)           | 11.520(11)           | 11.544(1)            | 11.548(1)            | 11.564(1)            | 11.574(2)            | 11.598(2)            |
| <i>b</i> / Å                                                        | 22.636(2)          | 22.646(2)          | 22.657(3)          | 22.646(2)          | 22.649(4)          | 22.654(6)          | 22.647(4)          | 7.918(7)             | 7.936(7)             | 7.917(9)             | 7.886(1)             | 7.870(9)             | 7.848(2)             | 7.817(2)             |
| <i>c</i> / Å                                                        | 7.7554(10)         | 7.9212(7)          | 7.830(1)           | 7.7670(11)         | 7.744(1)           | 7.722(2)           | 7.703(1)           | 13.062(11)           | 13.078(12)           | 13.071(2)            | 13.048(1)            | 13.042(2)            | 13.043(3)            | 13.021(3)            |
| $\alpha$ / °                                                        | 90                 | 90                 | 90                 | 90                 | 90                 | 90                 | 90                 | 90                   | 90                   | 90                   | 90                   | 90                   | 90                   | 90                   |
| $\beta$ / °                                                         | 90                 | 90                 | 90                 | 90                 | 90                 | 90                 | 90                 | 94.139(2)            | 94.049(2)            | 94.136(2)            | 94.15(1)             | 94.280(2)            | 94.384(3)            | 94.354(3)            |
| $\gamma$ / °                                                        | 120                | 120                | 120                | 120                | 120                | 120                | 120                | 90                   | 90                   | 90                   | 90                   | 90                   | 90                   | 90                   |
| <i>V</i> / Å <sup>3</sup>                                           | 3441.4(6)          | 3518.2(5)          | 3481.3(9)          | 3449.5(7)          | 3440.3(10)         | 3432.0(16)         | 3421.5(10)         | 1190.8(2)            | 1192.7(2)            | 1191.5(3)            | 1185.1(2)            | 1183.6(2)            | 1181.3(4)            | 1176.1(4)            |
| <i>Z</i>                                                            | 6                  | 6                  | 6                  | 6                  | 6                  | 6                  | 6                  | 2                    | 2                    | 2                    | 2                    | 2                    | 2                    | 2                    |
| <i>d</i> <sub>calc</sub> / g cm <sup>-3</sup>                       | 1.680              | 1.647              | 1.676              | 1.709              | 1.718              | 1.738              | 1.748              | 1.479                | 1.682                | 1.690                | 1.706                | 1.713                | 1.727                | 1.740                |
| $\mu$ / mm <sup>-1</sup>                                            | 1.896              | 1.981              | 2.277              | 2.601              | 2.770              | 2.948              | 3.136              | 2.492                | 3.117                | 3.364                | 3.572                | 3.780                | 3.999                | 4.2378               |
| <i>F</i> <sub>000</sub>                                             | 1728               | 1734               | 1746               | 1758               | 1764               | 1770               | 1776               | 540                  | 594                  | 596                  | 598                  | 600                  | 602                  | 604                  |
| <b>Crystal size</b> / mm                                            | 0.01X0.02X<br>0.48 | 0.06X0.07X0<br>.41 | 0.02X0.04X0.4<br>1 | 0.05X0.07X0.3<br>6 | 0.08X0.18X<br>0.42 | 0.05X0.06X<br>0.48 | 0.04X0.05X<br>0.48 | 0.08X0.17X<br>0.38   | 0.15X0.21X<br>0.41   | 0.13X0.14X<br>0.30   | 0.12X0.16X<br>0.44   | 0.06X0.17X<br>0.35   | 0.08X0.17X<br>0.38   | 0.02X0.03X<br>0.48   |
| <b>No. of unique reflns.</b><br>(Total)                             | 6925               | 7227               | 7574               | 6304               | 6841               | 6917               | 7000               | 7456                 | 6882                 | 7328                 | 6989                 | 7338                 | 7370                 | 7162                 |
| <b>No. of obsd reflns.</b><br>( <i>I</i> > 2 $\sigma$ ( <i>I</i> )) | 1435               | 1493               | 1236               | 1081               | 1605               | 1701               | 1703               | 2450                 | 2719                 | 2708                 | 2681                 | 2628                 | 2644                 | 3761                 |
| <i>R</i> <sub>1</sub> ( <i>I</i> > 2 $\sigma$ ( <i>I</i> ))         | 0.031              | 0.018              | 0.015              | 0.015              | 0.019              | 0.018              | 0.035              | 0.029                | 0.019                | 0.21                 | 0.022                | 0.020                | 0.030                | 0.033                |
| <i>wR</i> (all data)                                                | 0.034              | 0.021              | 0.017              | 0.018              | 0.024              | 0.022              | 0.038              | 0.028                | 0.023                | 0.26                 | 0.027                | 0.021                | 0.037                | 0.041                |
| <b>Goodness of fit/S</b>                                            | 1.034              | 1.006              | 1.067              | 1.054              | 1.054              | 1.043              | 1.081              | 1.024                | 1.014                | 1.038                | 1.024                | 1.046                | 1.029                | 1.001                |
| <b>Max. shift/error</b>                                             | 0.043              | <0.001             | 0.013              | 0.028              | 0.031              | 0.021              | 0.003              | <0.0001              | 0.015                | 0.028                | 0.034                | 0.00                 | 0.023                | 0.012                |

**Table S1. (cont)**

|                                     | La                     | Ce                     | Nd                     | Sm                     | Eu                     | Gd                     | Tb                     | Y                            | Dy                           | Ho                           | Er                               | Tm                           | Yb                            | Lu                            |
|-------------------------------------|------------------------|------------------------|------------------------|------------------------|------------------------|------------------------|------------------------|------------------------------|------------------------------|------------------------------|----------------------------------|------------------------------|-------------------------------|-------------------------------|
| Coordination                        | 8                      | 9                      | 9                      | 9                      | 9                      | 9                      | 9                      | 7                            | 7                            | 7                            | 7                                | 7                            | 7                             | 7                             |
| M...M / Å                           | 3.878(4)               | 3.961                  | 3.915(1)               | 3.884(1)               | 3.872(2)               | 3.861(1)               | 3.852(3)               | 4.124(1)                     | 4.135(1)                     | 4.122(2)                     | 4.107(2)                         | 4.096(1)                     | 4.083(3)                      | 4.067(2)                      |
| M—O / Å                             | 2.397(5) -<br>2.625(4) | 2.466(2) -<br>2.678(2) | 2.429(3) -<br>2.644(3) | 2.397(7) -<br>2.633(3) | 2.389(3) -<br>2.633(3) | 2.377(4) -<br>2.624(3) | 2.359(8) -<br>2.628(6) | 2.236(3) -<br>2.478(3)       | 2.254(3) -<br>2.489(3)       | 2.247(4) -<br>2.474(4)       | 2.228(4) -<br>2.465(4)           | 2.221(4) -<br>2.453(4)       | 2.209(7) -<br>2.443(7)        | 2.190(6) -<br>2.445(7)        |
| Dihedral angle / °<br>(COOM) vs C-C | 9.3(7)                 | 10.2(3)                | 10.4(3)                | 10.4(4)                | 10.0(5)                | 9.8(4)                 | 10.0(9)                | 2.2(6)<br>11.7(2)<br>13.0(4) | 1.6(8)<br>11.5(3)<br>12.6(5) | 2.7(7)<br>12.3(3)<br>13.1(6) | 24.9(8)<br>105.2(5)<br>148.1(3)  | 4.0(8)<br>12.0(2)<br>13.7(5) | 2.8(18)<br>13.6(4)<br>14.5(9) | 4.2(16)<br>11.6(5)<br>31.6(5) |
| Dihedral angle / °<br>(COOM) vs —Ph | 25.4(2)                | 24.9(1)                | 25.4(1)                | 25.8(1)                | 25.8(2)                | 26.1(2)                | 26.3(4)                | 8.7(1)<br>15.6(1)<br>30.3(2) | 7.9(2)<br>9.3(2)<br>28.9(2)  | 8.2(2)<br>14.9(2)<br>30.2(2) | 30.6(2)<br>94.5(5), 145<br>.9(2) | 8.1(2)<br>16.1(2)<br>30.4(2) | 8.6(3)<br>17.6(3)<br>31.0(4)  | 8.5(3)<br>16.0(3)<br>34.2(3)  |



**Table S2.** Selected bond lengths (Å) of Ln = Eu **6** (Type **I**) and Ln = Er **12** (Type **II**) complexes.

|                            | Eu       |                                 | Er       |
|----------------------------|----------|---------------------------------|----------|
| Eu(1)-O(1)                 | 2.633(3) | Er(1)-O(1)                      | 2.265(5) |
| Eu(1)-O(1) <sup>a</sup>    | 2.633(3) | Er(1)-O(2)                      | 2.242(5) |
| Eu(1)-O(1) <sup>b</sup>    | 2.633(3) | Er(1)-O(3)                      | 2.302(4) |
| Eu(1)-O(1) <sup>c</sup>    | 2.443(3) | Er(1)-<br>O(3) <sup>a</sup>     | 2.465(4) |
| Eu(1)-O(1) <sup>e</sup>    | 2.443(3) | Er(1)-O(4)                      | 2.360(5) |
| Eu(1)-O(2)                 | 2.389(3) | Er(1)-O(5)                      | 2.228(4) |
| Eu(1)-O(2) <sup>a</sup>    | 2.389(4) | Er(1)-O(6)                      | 2.250(5) |
| Eu(1)...Eu(1) <sup>d</sup> | 3.872(2) | Er(1) ...<br>Er(1) <sup>a</sup> | 4.107(2) |

Symmetry code of **6**: a = -Y,+X-Y,+Z; b = -X+Y,-X,+Z; c = -X+Y,+Y,1/2+Z; d = +X,+X-Y,1/2+Z; e = -Y,-X,1/2+Z. Symmetry code of **12**: a = -X,1/2+Y,-Z.

**Table S3.** Selected bond angles ( $^{\circ}$ ) of Ln = Eu **6** (Type **I**) and Ln = Er **12** (Type **II**) complexes.

| Eu                                         |           | Er                            |          |
|--------------------------------------------|-----------|-------------------------------|----------|
| O(1) <sup>a</sup> -Eu(1)-O(1)              | 65.26(9)  | O(2)-Er(1)-O(1)               | 154.1(2) |
| O(1) <sup>b</sup> -Eu(1)-O(1)              | 65.26(8)  | O(3)-Er(1)-O(1)               | 77.2(2)  |
| O(1) <sup>c</sup> -Eu(1)-O(1)              | 124.75(9) | O(3) <sup>a</sup> -Er(1)-O(1) | 131.7(2) |
| O(1) <sup>d</sup> -Eu(1)-O(1)              | 102.92(9) | O(4)-Er(1)-O(1)               | 77.8(2)  |
| O(1) <sup>e</sup> -Eu(1)-O(1)              | 161.3(1)  | O(5)-Er(1)-O(1)               | 92.6(2)  |
| O(1) <sup>d</sup> -Eu(1)-O(1) <sup>c</sup> | 71.1(1)   | O(6)-Er(1)-O(1)               | 93.1(2)  |
| O(2)-Eu(1)-O(1)                            | 51.4(1)   | O(3)-Er(1)-O(2)               | 76.8(2)  |
| O(2)-Eu(1)-O(1) <sup>c</sup>               | 73.9(1)   | O(3) <sup>a</sup> -Er(1)-O(2) | 74.2(2)  |
| O(2) <sup>a</sup> -Eu(1)-O(1)              | 116.1(1)  | O(4)-Er(1)-O(2)               | 128.0(2) |
| O(2) <sup>b</sup> -Eu(1)-O(1)              | 80.7(1)   | O(5)-Er(1)-O(2)               | 87.5(2)  |
| O(2)-Eu(1)-O(1) <sup>e</sup>               | 140.3(1)  | O(6)-Er(1)-O(2)               | 89.0(2)  |
| Eu(1)-O(1)-Eu(1) <sup>c</sup>              | 99.34(8)  | Er(1)-O(3)-Er(1) <sup>a</sup> | 118.9(2) |

Symmetry code of **6**: a = -Y,+X-Y,+Z; b = -X+Y,-X,+Z; c = -X+Y,+Y,1/2+Z; d = +X,+X-Y,1/2+Z; e = -Y,-X,1/2+Z. Symmetry code of **12**: a = -X,1/2+Y,-Z.
